# Supplementary material for: Sodium phthalate as an anode material for sodium ion batteries: effect of the bridging carbonyl group
Source: Royal Society of Chemistry journal article supplement (doi:10.1039/d0ta01281e), 2020-01-01
Supplement: d0ta01281e1.pdf [file d0ta01281e1.pdf]

**Sodium Phthalate as an Anode Material for Sodium Ions Batteries:  
Effect of the Bridging Carbonyl Group**

*Liang-Yu Wang,<sup>a</sup> Chao Ma,<sup>a</sup> Xiao Wei,<sup>a</sup> Baobao Chang,<sup>b</sup> Kai-Xue Wang\*<sup>a</sup> and Jie-*

*Sheng Chen<sup>a</sup>*

<sup>a</sup>Shanghai Key Laboratory for Molecular Engineering of Chiral Drugs, School of Chemistry and Chemical Engineering, Frontiers Science Center for Transformative Molecules, Shanghai Jiao Tong University, Shanghai 200240, P. R. China

<sup>b</sup>Key Laboratory of Materials Processing and Mold of Ministry of Education, Zhengzhou University, Zhengzhou, 450001, P. R. China

**Corresponding Author**

\* E-mail Address: [k.wang@sjtu.edu.cn](mailto:k.wang@sjtu.edu.cn)

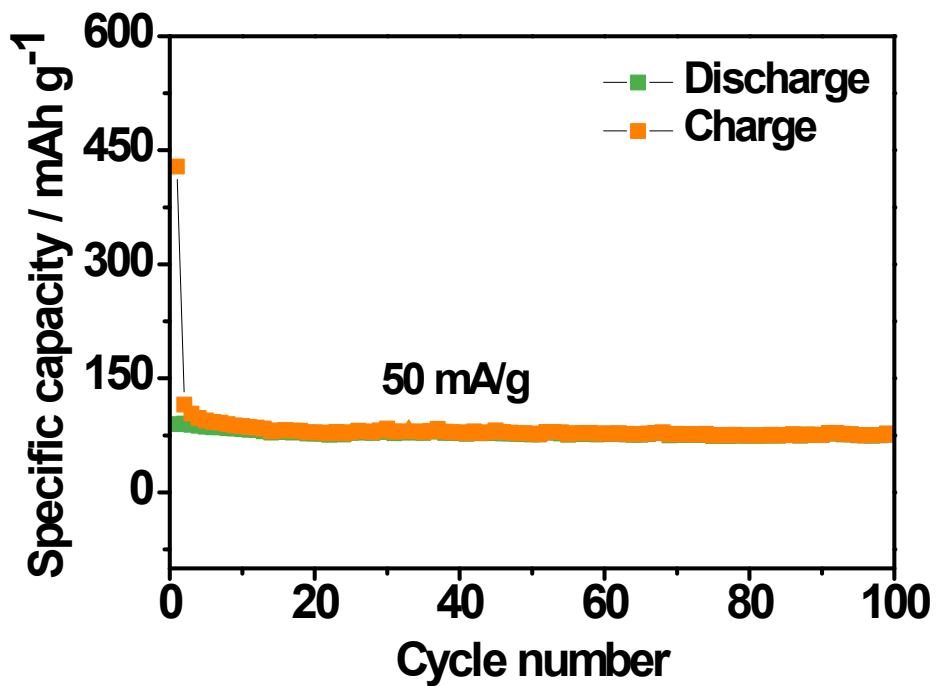

Figure S1. Cycling performance of sodium phthalate at a current density of 50 mA

g<sup>-1</sup>

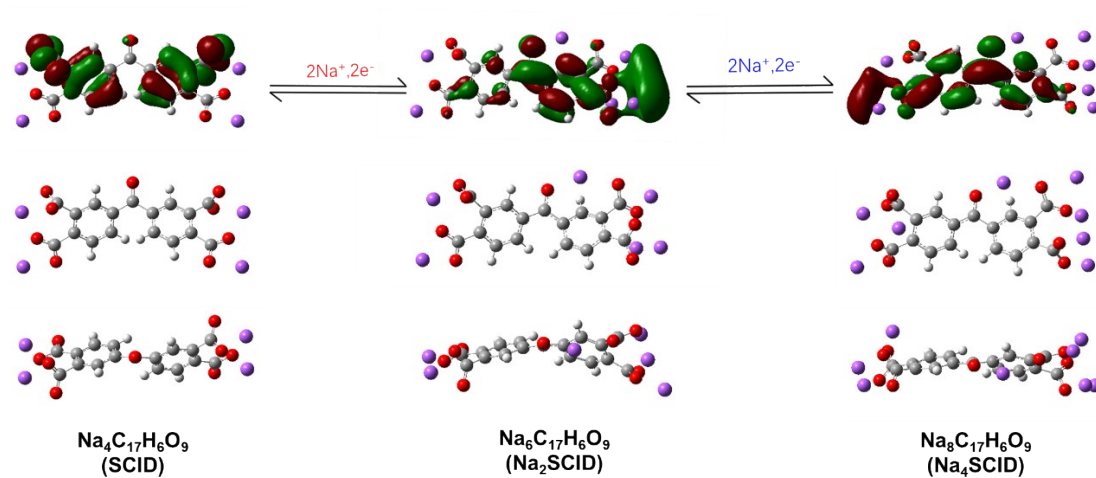

**Figure S2.** Calculated HOMO plots and spatial structure of molecule SCID with different uptake amounts of sodium.

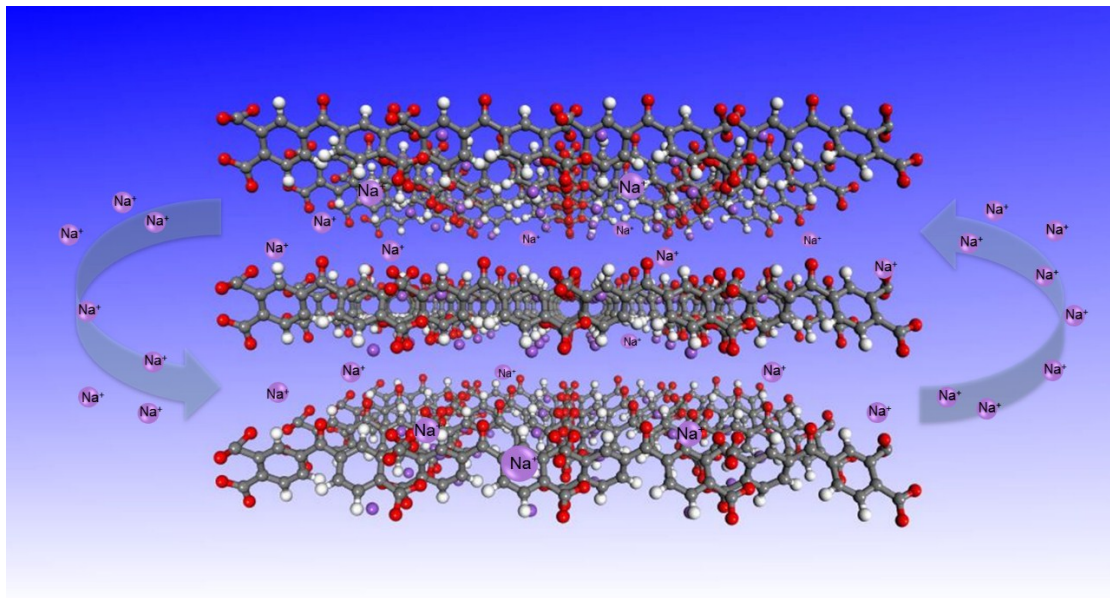

**Figure S3.** Spatial structure of SCID after recrystallization and sodium ion transfer process

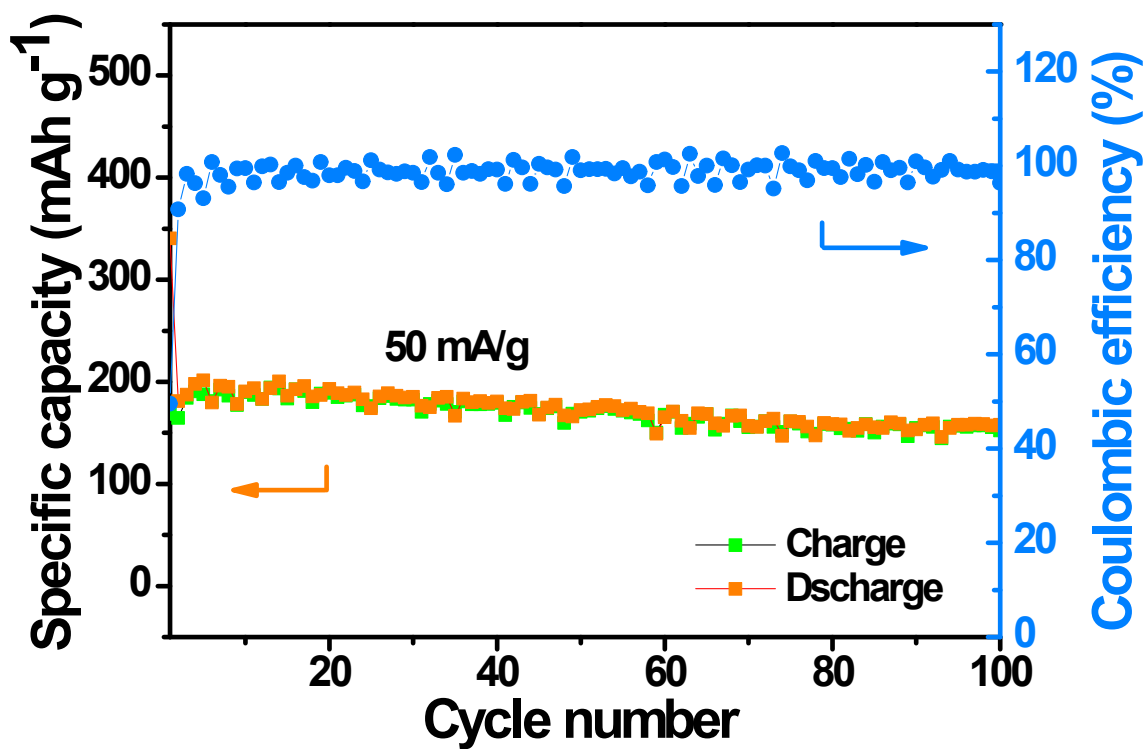

Figure S4. Cycling performance of SCID at a current density of 50 mA g<sup>-1</sup>

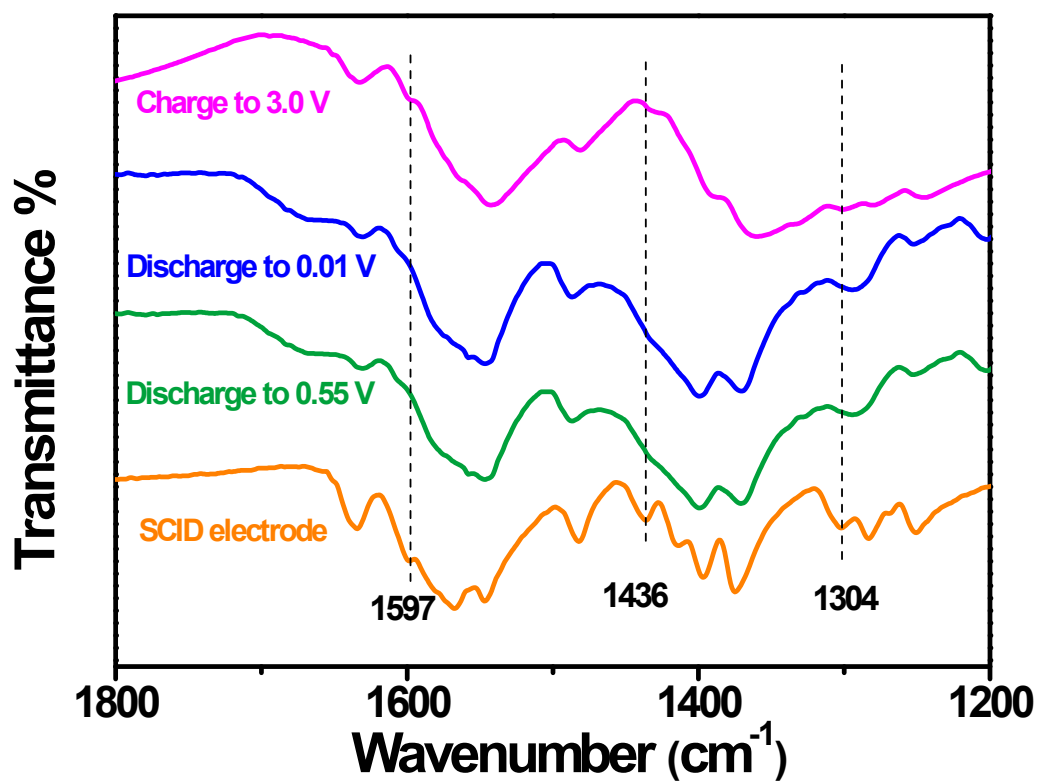

Figure S5. ATR-FTIR spectrum of pure SCID, discharged to 0.5V, 0.01 V and charged to 3.0 V

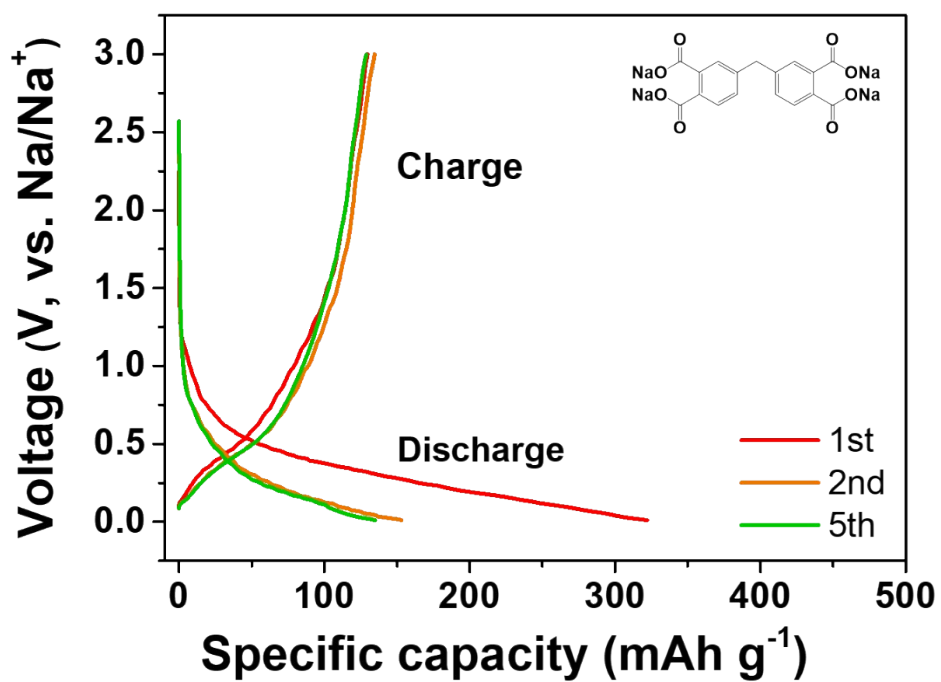

**Figure S6.** Galvanostatic discharge/charge profiles of SDTC at a current density of 50

mA g<sup>-1</sup>:

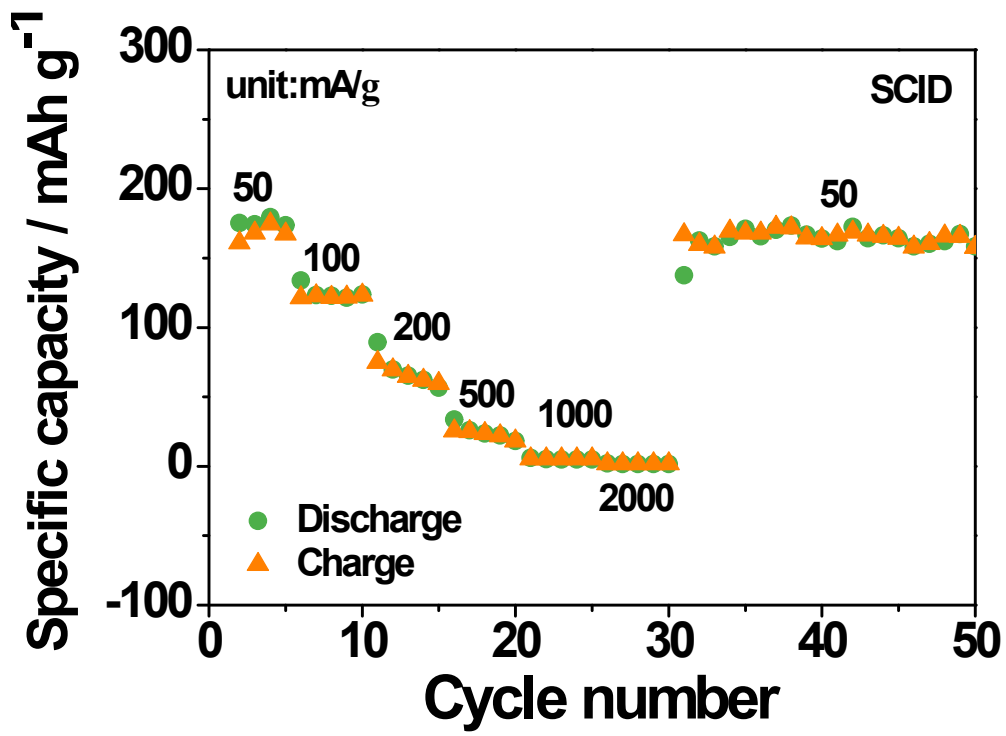

Figure S7. the rate capabilities of SCID



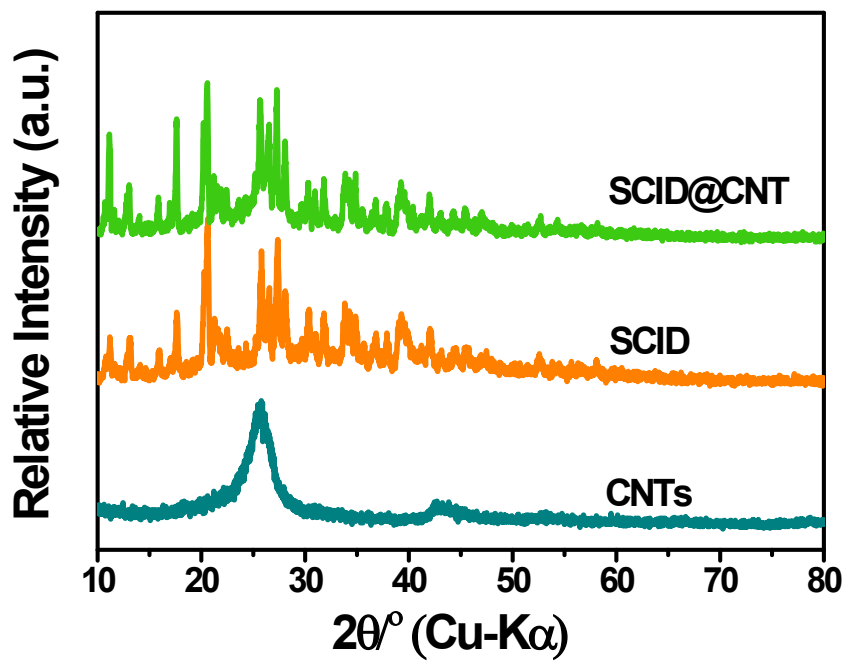

Figure S8. X-ray diffraction patterns of SCID@CNT, SCID, and CNT.

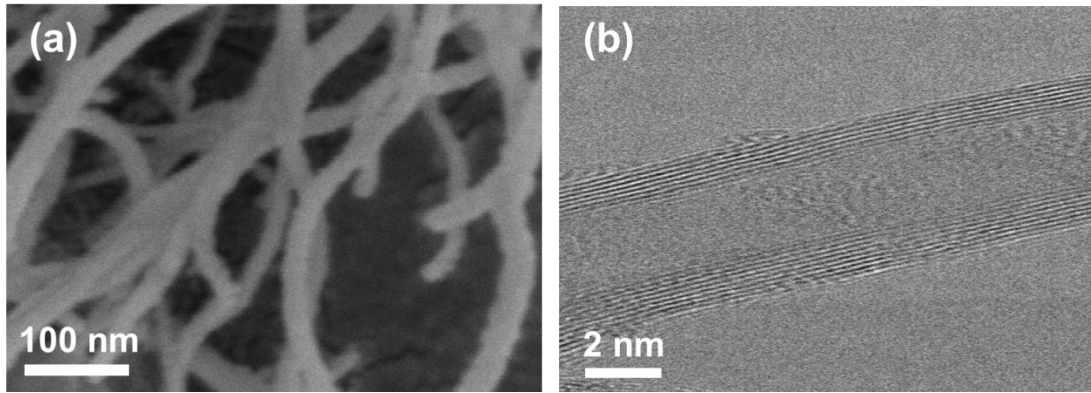

**Figure S9.** (a) SEM and (b) TEM images of MWCNTs,

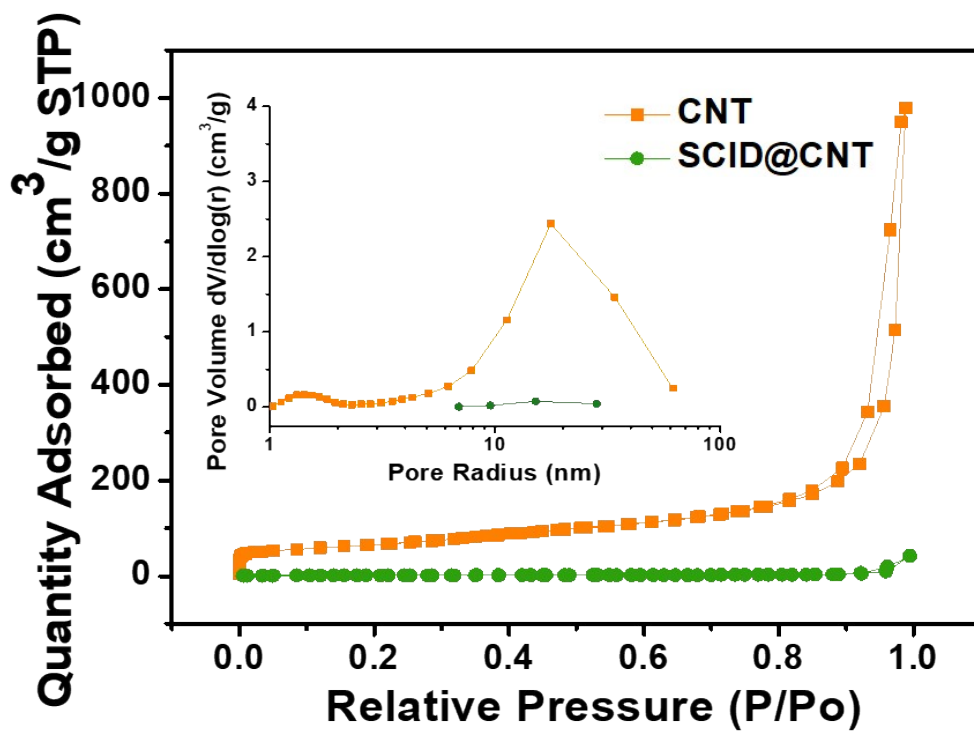

Figure S10.  $N_2$  adsorption/desorption isotherms and pore size distribution of CNT and SCID@CNT.

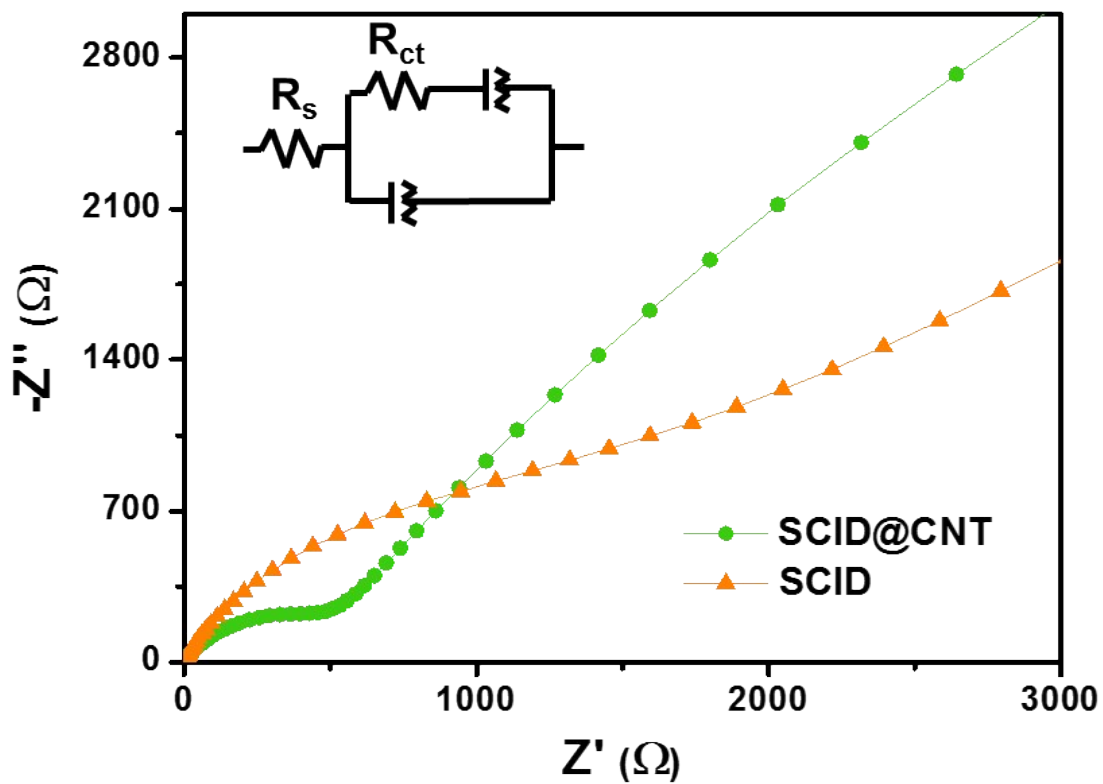

**Figure S11.** Electrochemical impedance spectrum and equivalent circuit diagram of the SCID@CNT and SCID electrodes after first cycling

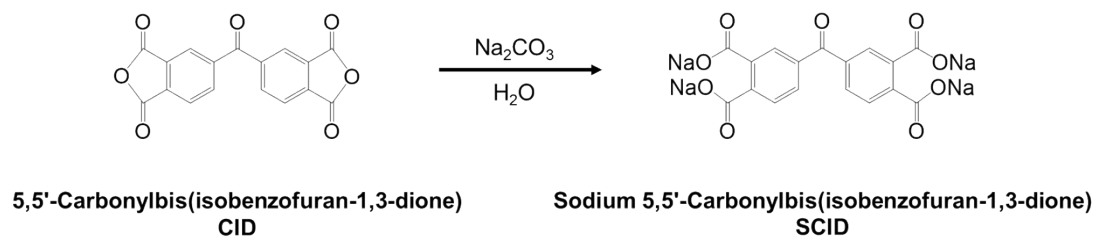

**Figure S12.** Synthesis route diagram of the SCID

**Table S1.** Voltage under different sodium-insertion conditions

| Insertion conditions                        | Vacuum | Organic solvents<br>(DMSO) | Inorganic solvents<br>(H <sub>2</sub> O) |
|---------------------------------------------|--------|----------------------------|------------------------------------------|
| Insertion voltage<br>(Na <sub>4</sub> SCID) | 0.97 V | 0.33 V                     | 0.33 V                                   |
| Insertion voltage<br>(Na <sub>2</sub> SCID) | 1.05 V | 1.42 V                     | 1.44 V                                   |

**Table S2** Electrochemical performances of SCID@CNT compared to references of organic-based active materials and composites.

| Materials                                | Carbon additives [wt%] | Discharge capacity 1st/2nd (mAh g <sup>-1</sup> ) | Rates                   | Capacity (mAh g <sup>-1</sup> )/ Cycle number | Ref.      |
|------------------------------------------|------------------------|---------------------------------------------------|-------------------------|-----------------------------------------------|-----------|
| GO-CADs                                  | 20% CB                 | 293                                               | 20 mA g <sup>-1</sup>   | ~130/100                                      | 1         |
| (COONa) <sub>2</sub> Na <sub>2</sub> BDC | 35% SP                 | 305/160                                           | 20 mA g <sup>-1</sup>   | 130/20                                        | 2         |
| ALD20                                    | 10% CB                 | 285                                               | 0.1 C                   | 225/100                                       | 3         |
| SSDC                                     | 40% SP                 | 247                                               | 1000 mA g <sup>-1</sup> | 112/400                                       | 4         |
| SPT                                      | 50% AB                 | 242                                               | 20 mA g <sup>-1</sup>   | 68/50                                         | 5         |
| BDT-G                                    | 40% AB                 | 217                                               | 0.2 C                   | 175/70                                        | 6         |
| HA                                       | 10% SP                 | 163                                               | 40 mA g <sup>-1</sup>   | 133/200                                       | 7         |
| Na <sub>2</sub> PDS                      | 30% SP                 | 309/224.9                                         | 100 mA g <sup>-1</sup>  | 183/150                                       | 8         |
| Na <sub>2</sub> DBQ                      | 30% CB                 | 398/265                                           | 0.1 C                   | 231/50                                        | 9         |
| PTCDA                                    | 20% SP                 | 135/145                                           | 200 mA g <sup>-1</sup>  | 100/200                                       | 10        |
| PI                                       | 30% SP                 | 120/122                                           | 50 mA g <sup>-1</sup>   | 86/100                                        | 11        |
| SCID@CNT                                 | 20% SP                 | 476/252                                           | 50 mA g <sup>-1</sup>   | 182/100                                       | This work |

**GO-CAD:** graphene oxide-croconic acid disodium salt

**(COONa)<sub>2</sub>Na<sub>2</sub>BDC:** 1,2,4,5-tetrasodiumterephthalate

**ALD20:** Disodium terephthalate electrode was coated through the atomic layer deposition (ALD) method for 20 cycles

**SSDC:** sodium 4,4'-stilbene-dicarboxylate

**SPT:** sulfur-containing dithiin ring, dibenzo[b,i]thianthrene-5,7,12,14-tetrone

**BDT-G:** 4,8-dihydrobenzo[1,2-b:4,5-b'] dithiophene-4,8-dione-graphene

**HA:** Humic acid

**Na<sub>2</sub>PDS:** poly (2,5-dihydroxy-p-benzoquinonyl sulfide)

**Na<sub>2</sub>DBQ:** Disodium 2,5-dihydroxy-1,4-benzoquinone

**PTCDA:** 3,4,9,10-perylene-tetracarboxylicacid-dianhydride

**PI:** polyimide

### S13. Coordinates of molecular structures

All coordinates are reported as XYZ Cartesian coordinates. Converged geometries and the thermochemistry were also obtained from M06/6-31+G(d,p) level of theory. They are stated in Hartrees units. All energies reported were calculated using the GAUSSIAN 09 Revision-D.01 computational chemistry package.

(a)

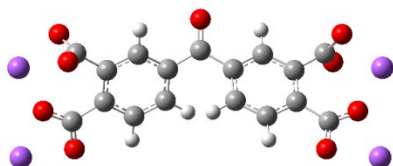

#### Standard orientation

| Center Number | Element Symbol | Coordinates (Angstroms) |          |          |
|---------------|----------------|-------------------------|----------|----------|
|               |                | X                       | Y        | Z        |
| 1             | C              | -3.79629                | -0.50445 | -0.41317 |
| 2             | C              | -3.70387                | 0.735007 | 0.26166  |
| 3             | C              | -2.46072                | 1.36218  | 0.380895 |
| 4             | C              | -1.29406                | 0.776363 | -0.12427 |
| 5             | C              | -2.62193                | -1.07386 | -0.93828 |
| 6             | C              | 1.294062                | 0.776354 | 0.124121 |
| 7             | C              | 1.384517                | -0.45758 | 0.788728 |
| 8             | C              | 2.621879                | -1.07389 | 0.938172 |
| 9             | C              | 3.796269                | -0.50448 | 0.413116 |
| 10            | C              | 3.703884                | 0.73498  | -0.26172 |
| 11            | C              | 2.460743                | 1.362166 | -0.38099 |
| 12            | C              | -5.07418                | -1.2841  | -0.63304 |
| 13            | C              | -4.91831                | 1.404639 | 0.861288 |
| 14            | C              | 4.918356                | 1.404599 | -0.8613  |
| 15            | C              | 5.07414                 | -1.28414 | 0.633044 |
| 16            | O              | -6.2189                 | -0.87212 | -0.19671 |
| 17            | O              | -5.23416                | 1.07125  | 2.04142  |
| 18            | O              | 5.234349                | 1.071087 | -2.04135 |
| 19            | O              | 4.980381                | -2.37544 | 1.275225 |
| 20            | O              | 5.594568                | 2.163205 | -0.10779 |
| 21            | Na             | 7.193057                | 0.835184 | -0.96536 |
| 22            | O              | 6.218915                | -0.87207 | 0.196925 |



|    |    |          |          |          |
|----|----|----------|----------|----------|
| 23 | Na | 7.102103 | -2.71161 | 1.145885 |
| 24 | O  | -5.59465 | 2.163117 | 0.10777  |
| 25 | Na | -7.19296 | 0.835084 | 0.965701 |
| 26 | O  | -4.98048 | -2.37531 | -1.27539 |
| 27 | Na | -7.10218 | -2.71155 | -1.14583 |
| 28 | H  | -2.38982 | 2.325065 | 0.876058 |
| 29 | H  | -2.70453 | -2.01609 | -1.46664 |
| 30 | H  | 0.497931 | -0.92026 | 1.20919  |
| 31 | H  | 2.704453 | -2.01612 | 1.466523 |
| 32 | H  | 2.389874 | 2.325057 | -0.87615 |
| 33 | C  | 0.000004 | 1.528771 | -0.0001  |
| 34 | O  | 0.000004 | 2.755585 | -5.3E-05 |
| 35 | C  | -1.38456 | -0.45757 | -0.78888 |
| 36 | H  | -0.49799 | -0.92025 | -1.20939 |

Zero-point Energy correction= 0.205630

Thermal correction to Energy= 0.233581

Thermal correction to Enthalpy= 0.234525

Thermal correction to Free Energy= 0.141745

Electronic Energy (EE) + Zero-point Energy= -1977.816350

Electronic Energy (EE) + Thermal Energy Correction= -1977.788399

Electronic Energy (EE) + Thermal Enthalpy Correction= -1977.787455

Electronic Energy (EE) + Thermal Free Energy Correction= -1977.880236

(b)

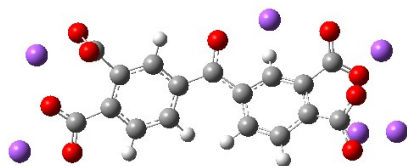

### Standard orientation

| Center Number | Element Symbol | Coordinates (Angstroms) |          |          |
|---------------|----------------|-------------------------|----------|----------|
|               |                | X                       | Y        | Z        |
| 1             | C              | 3.334286                | 0.252519 | -0.60904 |
| 2             | C              | 3.534999                | -0.92415 | 0.181931 |
| 3             | C              | 2.40253                 | -1.80172 | 0.301062 |
| 4             | C              | 1.129643                | -1.40433 | -0.06528 |
| 5             | C              | 0.902512                | -0.10862 | -0.64876 |

|    |    |          |          |          |
|----|----|----------|----------|----------|
| 6  | C  | 2.087573 | 0.568792 | -1.07796 |
| 7  | C  | -0.26712 | 0.733473 | -0.60024 |
| 8  | O  | -0.08204 | 2.014053 | -0.60549 |
| 9  | C  | 4.484466 | 1.140758 | -0.96983 |
| 10 | C  | 4.780672 | -1.16514 | 0.907639 |
| 11 | O  | 5.551536 | 0.610342 | -1.43564 |
| 12 | O  | 5.438271 | -0.17528 | 1.439228 |
| 13 | O  | 5.290948 | -2.35984 | 0.919685 |
| 14 | Na | 5.517927 | -1.67794 | -1.40203 |
| 15 | O  | 4.380521 | 2.375539 | -0.66886 |
| 16 | Na | 6.451366 | 1.601864 | 0.460321 |
| 17 | H  | 2.541137 | -2.75197 | 0.80966  |
| 18 | H  | 0.291818 | -2.04466 | 0.189084 |
| 19 | H  | 1.97629  | 1.372239 | -1.80563 |
| 20 | Na | 7.062013 | -1.6248  | 2.088099 |
| 21 | Na | 1.987132 | 2.830598 | -0.09729 |
| 22 | C  | -1.64343 | 0.214903 | -0.49465 |
| 23 | C  | -2.01415 | -1.08019 | -0.91616 |
| 24 | C  | -2.65465 | 1.056752 | 0.003492 |
| 25 | C  | -3.33004 | -1.50415 | -0.81048 |
| 26 | H  | -1.27779 | -1.73789 | -1.36553 |
| 27 | C  | -3.97907 | 0.636655 | 0.120723 |
| 28 | H  | -2.38198 | 2.06211  | 0.304536 |
| 29 | C  | -4.34182 | -0.67188 | -0.2855  |
| 30 | H  | -3.61278 | -2.49534 | -1.14533 |
| 31 | C  | -4.99406 | 1.601572 | 0.686743 |
| 32 | C  | -5.72345 | -1.2572  | -0.21886 |
| 33 | O  | -5.20596 | 1.556615 | 1.935796 |
| 34 | O  | -5.64414 | 2.313918 | -0.13501 |
| 35 | O  | -5.87415 | -2.45074 | -0.63662 |
| 36 | O  | -6.74028 | -0.59519 | 0.242045 |
| 37 | Na | -7.97254 | -2.41232 | -0.19653 |
| 38 | Na | -7.29206 | 1.42367  | 1.105881 |

Zero-point Energy correction= 0.204860

Thermal correction to Energy= 0.236639

Thermal correction to Enthalpy= 0.237583

Thermal correction to Free Energy= 0.138156

Electronic Energy (EE) + Zero-point Energy= -2302.454289

Electronic Energy (EE) + Thermal Energy Correction= -2302.422509

Electronic Energy (EE) + Thermal Enthalpy Correction= -2302.421565

Electronic Energy (EE) + Thermal Free Energy Correction= -2302.520993

(c)

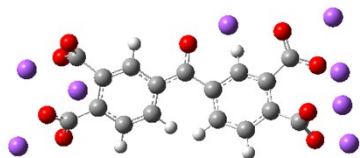

### Standard orientation

| Center Number | Element Symbol | Coordinates (Angstroms) |          |          |
|---------------|----------------|-------------------------|----------|----------|
|               |                | X                       | Y        | Z        |
| 1             | C              | -3.2805                 | 0.17029  | 0.339478 |
| 2             | C              | -3.48499                | -1.14425 | -0.13084 |
| 3             | C              | -2.33914                | -1.94785 | -0.31871 |
| 4             | C              | -1.04755                | -1.44406 | -0.17978 |
| 5             | C              | -0.82095                | -0.10235 | 0.235106 |
| 6             | C              | -1.98846                | 0.609706 | 0.601439 |
| 7             | C              | 0.38695                 | 0.722436 | 0.102815 |
| 8             | O              | 0.174622                | 2.006591 | -0.07315 |
| 9             | C              | -4.36697                | 1.176278 | 0.527538 |
| 10            | C              | -4.84249                | -1.66218 | -0.50983 |
| 11            | O              | -5.55549                | 0.792947 | 0.84139  |
| 12            | O              | -5.42501                | -1.19711 | -1.54499 |
| 13            | O              | -5.39737                | -2.54197 | 0.237499 |
| 14            | Na             | -6.46178                | -1.08582 | 1.707943 |
| 15            | O              | -4.0986                 | 2.408387 | 0.333428 |
| 16            | Na             | -6.91829                | 0.531491 | -1.28405 |
| 17            | H              | -2.46996                | -2.96799 | -0.67    |
| 18            | H              | -0.21521                | -2.07457 | -0.47121 |
| 19            | H              | -1.85749                | 1.546637 | 1.130351 |
| 20            | Na             | -7.19425                | -2.70204 | -1.21412 |
| 21            | Na             | -1.79327                | 2.820368 | -0.62112 |
| 22            | C              | 1.716602                | 0.202128 | 0.12138  |
| 23            | C              | 2.0806                  | -1.1114  | 0.572459 |
| 24            | C              | 2.802877                | 1.075112 | -0.22314 |
| 25            | C              | 3.388828                | -1.54873 | 0.547049 |
| 26            | H              | 1.321644                | -1.77241 | 0.976675 |
| 27            | C              | 4.109129                | 0.637836 | -0.25488 |
| 28            | H              | 2.573774                | 2.116877 | -0.41825 |
| 29            | C              | 4.443943                | -0.72382 | 0.056713 |
| 30            | H              | 3.629604                | -2.55633 | 0.876138 |

---

|    |    |          |          |          |
|----|----|----------|----------|----------|
| 31 | C  | 5.248514 | 1.617286 | -0.37452 |
| 32 | C  | 5.805176 | -1.25925 | -0.03755 |
| 33 | O  | 5.40674  | 2.309917 | -1.40819 |
| 34 | O  | 6.109032 | 1.586812 | 0.595684 |
| 35 | O  | 6.221794 | -2.04496 | 0.913548 |
| 36 | O  | 6.617577 | -0.91727 | -0.99061 |
| 37 | Na | 8.151235 | -2.33189 | -0.14127 |
| 38 | Na | 7.396078 | 1.179398 | -1.36192 |
| 39 | Na | -6.35198 | 2.941932 | 0.859324 |
| 40 | Na | 5.69243  | -0.00091 | 2.136212 |

---

Zero-point Energy correction= 0.205824

Thermal correction to Energy= 0.241991

Thermal correction to Enthalpy= 0.242935

Thermal correction to Free Energy= 0.133161

Electronic Energy (EE) + Zero-point Energy= -2627.084805

Electronic Energy (EE) + Thermal Energy Correction= -2627.048639

Electronic Energy (EE) + Thermal Enthalpy Correction= -2627.047694

Electronic Energy (EE) + Thermal Free Energy Correction= -2627.157469

## References

1. C. Luo, Y. Zhu, Y. Xu, Y. Liu, T. Gao, J. Wang and C. Wang, *J. Power Sources*, 2014, **250**, 372-378.
2. A. Abouimrane, W. Weng, H. Eltayeb, Y. Cui, J. Niklas, O. Poluektov and K. Amine, *Energy Environ. Sci.*, 2012, **5**, 9632.
3. L Zhao, J. Zhao, Y-S Hu, H. Li, Z. Zhou, M. Armand and L. Chen, *Adv. Eng. Mater*, 2012, **2**, 962–965.
4. C. Wang, Y. Xu, Y. Fang, M. Zhou, L. Liang, S. Singh, H. Zhao, A. Schober and Y. Lei, *J. Am. Chem. Soc.*, 2015, **137**, 3124-3130.
5. M. Yao, H. Ando and T. Kiyobayashi, *Energy Procedia*, 2016, **89**, 222-230.
6. X. Chen, Y. Wu, Z. Huang, X. Yang, W. Li, L. C. Yu, R. Zeng, Y. Luo and S.-L. Chou, *J. Mater. Chem. A*, 2016, **4**, 18409-18415.
7. H. Zhu, J. Yin, X. Zhao, C. Wang and X. Yang, *Chem. Commun.*, 2015, **51**, 14708-14711.
8. D. Wu, Y. Huang and X. Hu, *Chem. Commun.*, 2016, **52**, 11207-11210.
9. Z. Zhu, H. Li, J. Liang, Z. Tao and J. Chen, *Chem. Commun.*, 2015, **51**, 1446-1448.
10. W. Luo, M. Allen, V. Raju and X. Ji, *Adv. Eng. Mater.*, 2014, **4**, 1400554.
11. F. Xu, J. Xia, W. Shi and S. Cao, *Mater. Chem. Phys.*, 2016, **169**, 192-197.
